# Supplementary material for: Design, synthesis and biological evaluation of a novel Cu2+-selective fluorescence sensor for bio-detection and chelation
Source: Royal Society of Chemistry journal article supplement (doi:10.1039/c5ra12620g), 2015-01-01
Supplement: c5ra12620g1.pdf [file c5ra12620g1.pdf]

# Supplementary Data

## **Design, synthesis and biological evaluation of a novel Cu<sup>2+</sup>- selective fluorescence sensor for bio-detection and chelation**

Yu Gao\*, Yazhen Li, Xiping Yang, Fangfei He, Jiamei Huang, Minghong Jiang,  
Zaihui Zhou, Haijun Chen\*

College of Chemistry, Fuzhou University, Fuzhou, Fujian, China, 350108

Corresponding authors:

\*Yu Gao, PhD

College of Chemistry

Fuzhou University

Fuzhou, Fujian 350108, China

Email: [hellogaoyu@126.com](mailto:hellogaoyu@126.com)

\*Haijun Chen, PhD

College of Chemistry

Fuzhou University

Fuzhou, Fujian 350108, China

Email: [chenhajj@gmail.com](mailto:chenhajj@gmail.com)

### **Table of Contents**

Fig. S1, Fig. S2, Fig. S3, Copies of <sup>1</sup>H NMR, <sup>13</sup>C NMR spectra and HRMS of **FZU-06,001** and **FZU-06,002**

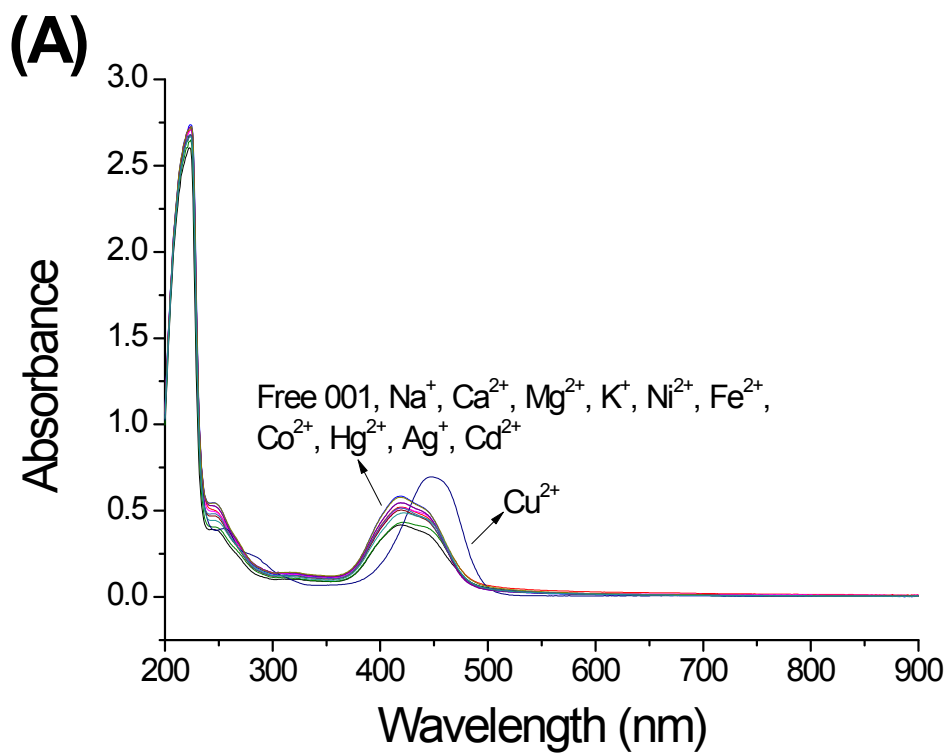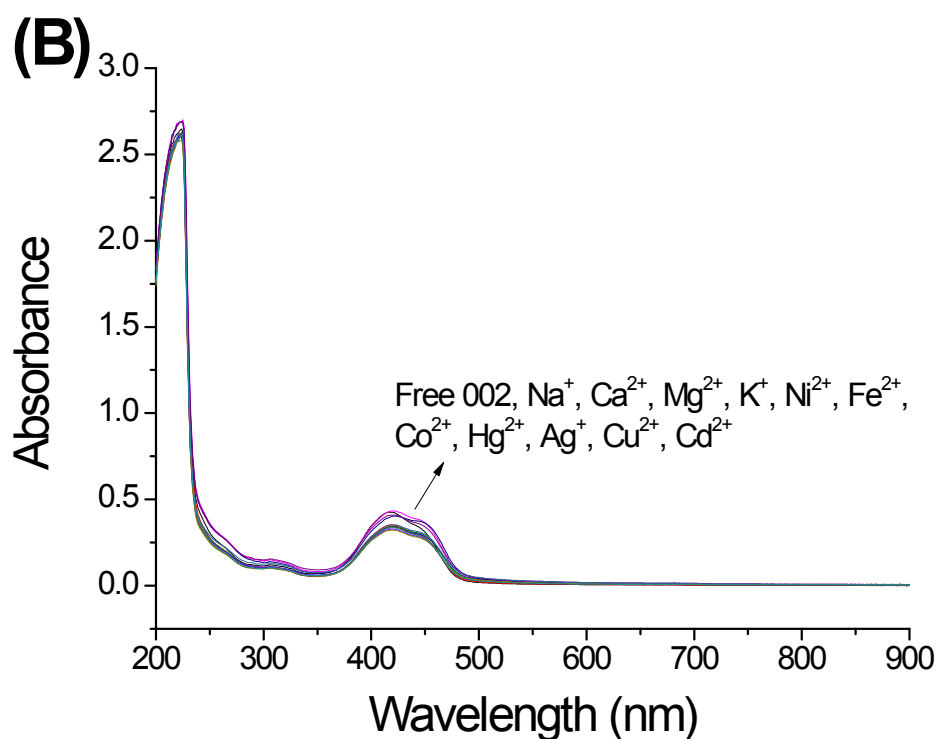

**Fig. S1** UV-vis spectra of **FZU-06,001** (20  $\mu$ M) (A) or **FZU-06,002** (20  $\mu$ M) (B) with addition of chloride and nitrate salts of Na<sup>+</sup>, Ca<sup>2+</sup>, Mg<sup>2+</sup>, K<sup>+</sup>, Ni<sup>2+</sup>, Fe<sup>2+</sup>, Co<sup>2+</sup>, Hg<sup>2+</sup>, Ag<sup>+</sup>, Cu<sup>2+</sup>, Cd<sup>2+</sup> at concentration of 200  $\mu$ M in HEPES buffer solutions (20 mM, pH 7.4).

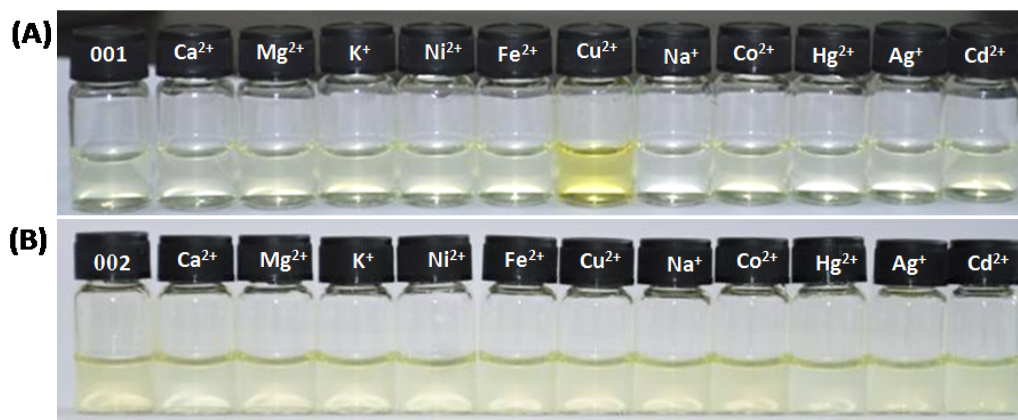

**Fig. S2** Color changes of **FZU-06,001** (20  $\mu$ M) (A) or **FZU-06,002** (20  $\mu$ M) (B) with addition of chloride and nitrate salts of Na<sup>+</sup>, Ca<sup>2+</sup>, Mg<sup>2+</sup>, K<sup>+</sup>, Ni<sup>2+</sup>, Fe<sup>2+</sup>, Co<sup>2+</sup>, Hg<sup>2+</sup>, Ag<sup>+</sup>, Cu<sup>2+</sup>, Cd<sup>2+</sup> at concentration of 200  $\mu$ M in HEPES buffer solutions (20 mM, pH 7.4).

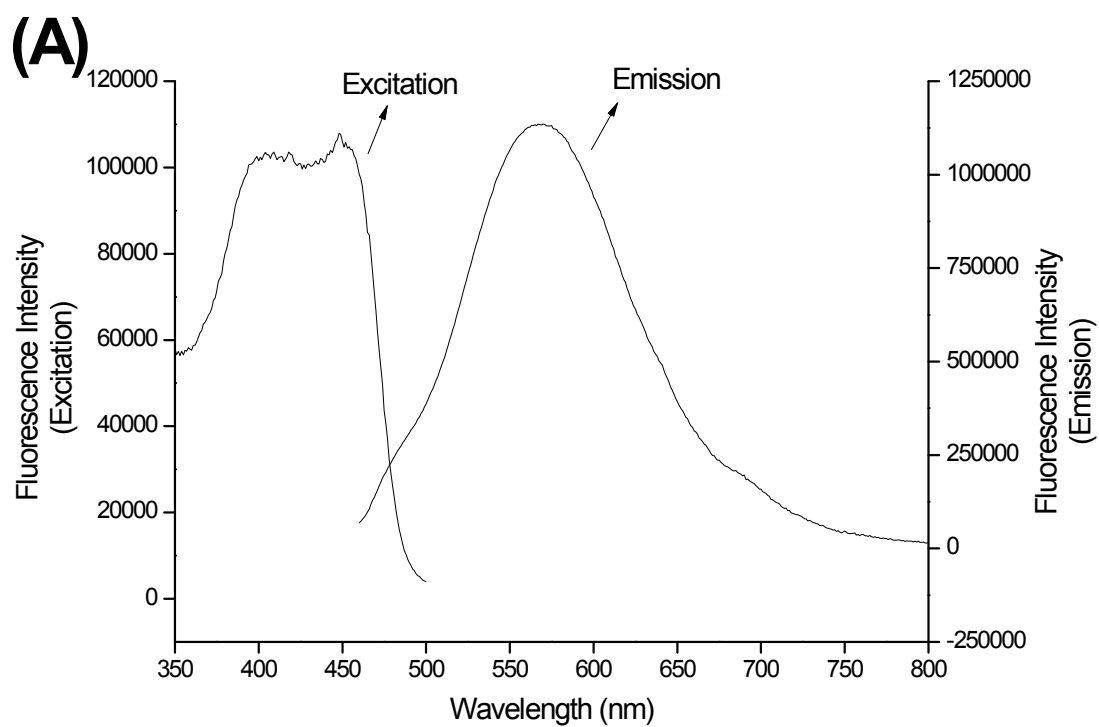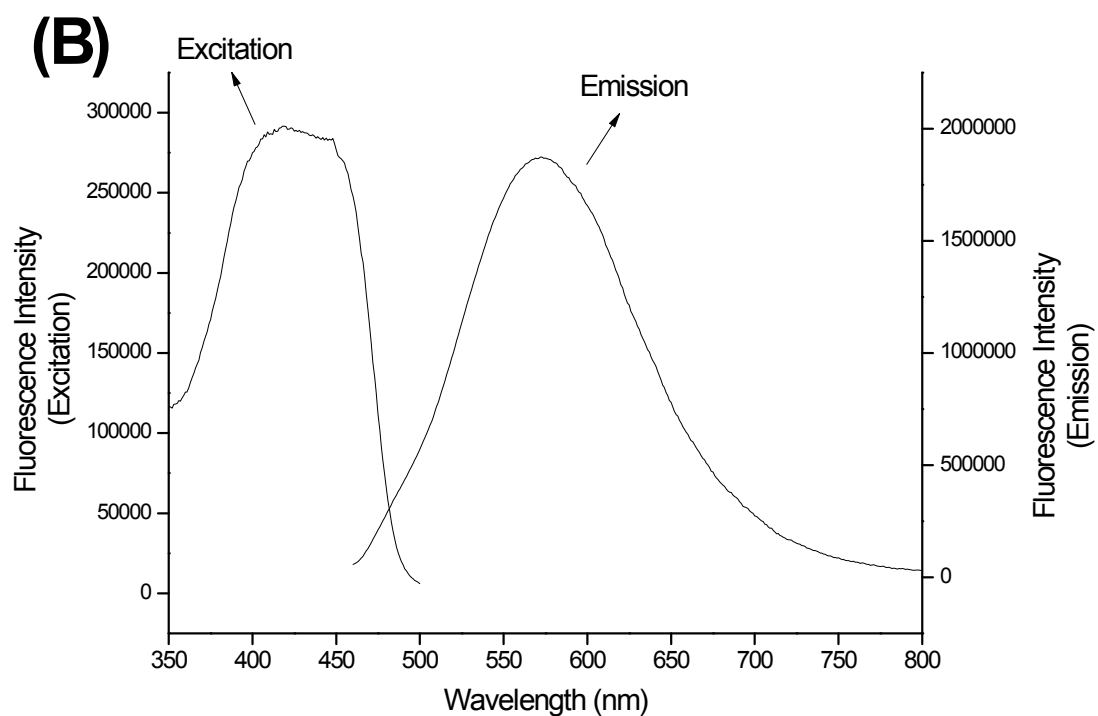

**Fig. S3** Fluorescence excitation and emission spectrum of **FZU-06,001** (20  $\mu\text{M}$ ) (A) or **FZU-06,002** (20  $\mu\text{M}$ ) (B) at concentration of 200  $\mu\text{M}$  in HEPES buffer solutions (20 mM, pH 7.4).

# 7-(Diethylamino)-2-oxo-*N*-(quinolin-8-yl)-2*H*-chromene-3-carboxamide (FZU-06,001)

Jan04-2014FZU-ZHZ-0003-003-2

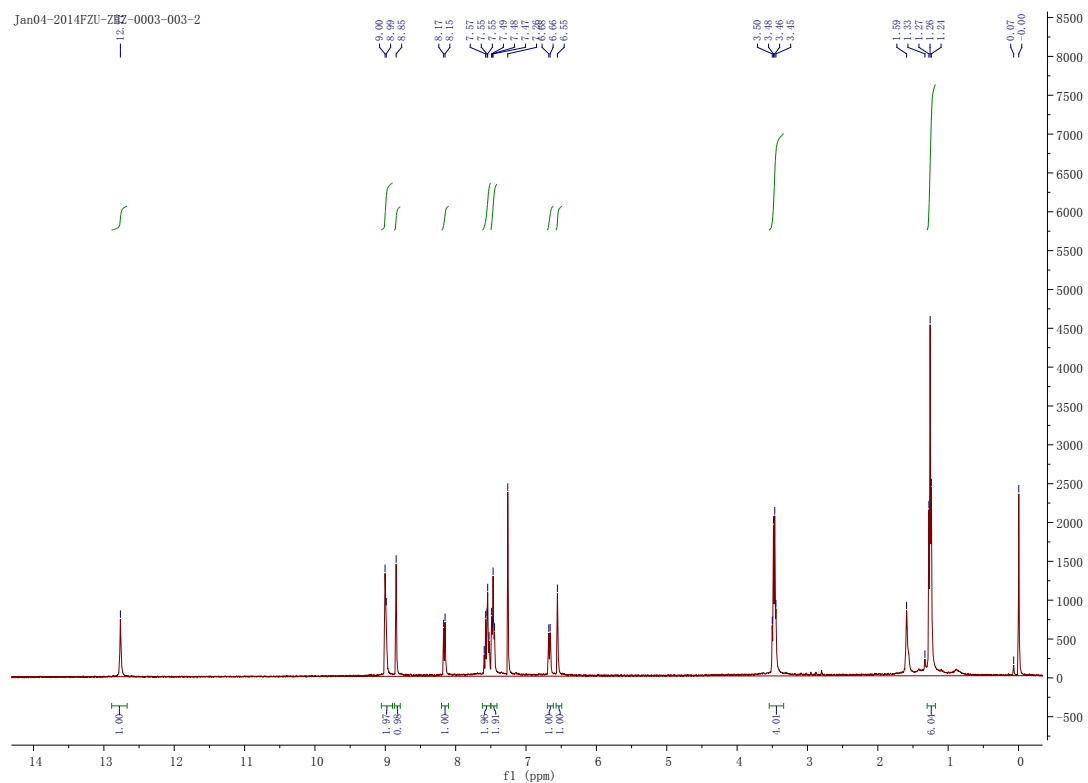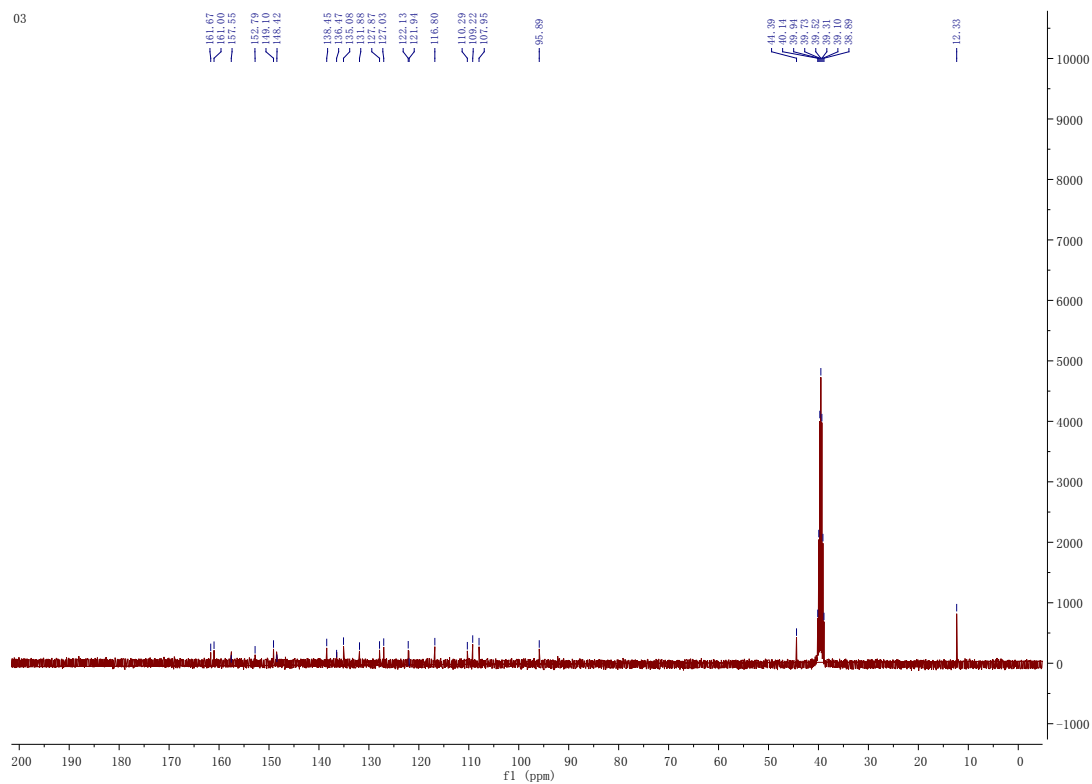

ZHZ-003 #31 RT: 0.07 AV: 1 NL: 2.41E7  
T: FTMS + p ESI Full ms [100.00-600.00]

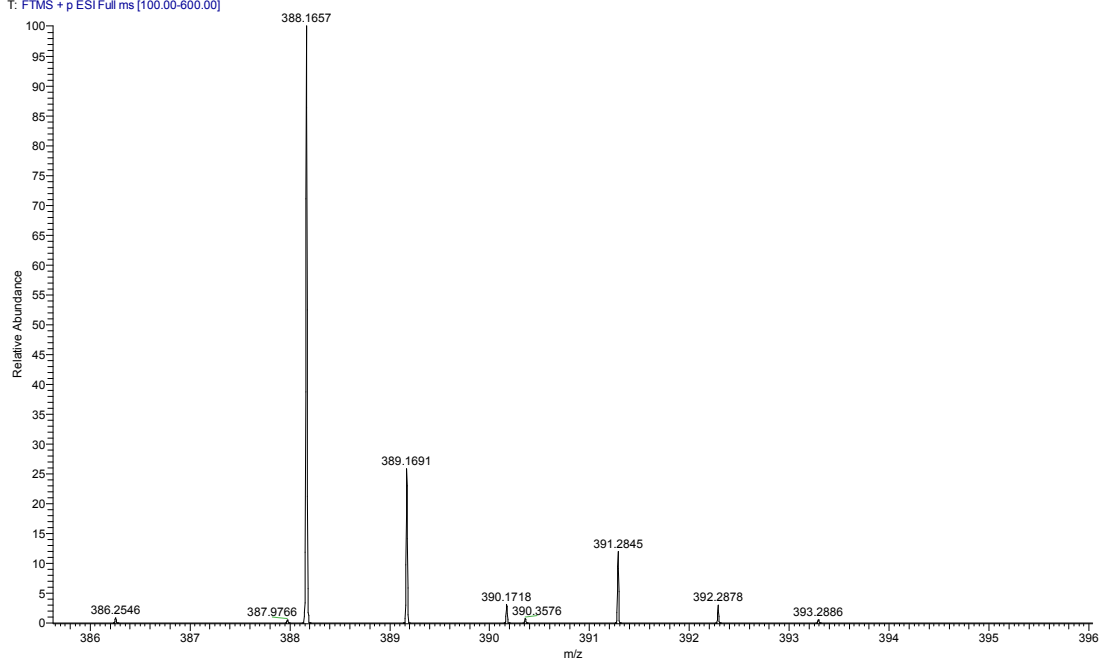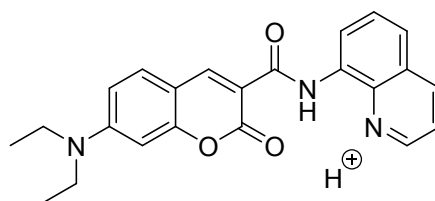

**FZU-06,001**

Chemical Formula:  $C_{23}H_{22}N_3O_3^+$

Exact Mass: 388.1656

# 7-(Diethylamino)-*N*-(naphthalen-1-yl)-2-oxo-2*H*-chromene-3-carboxamide (FZU-06,002)

Jan04-2014FZU-ZHA-0003-004.53

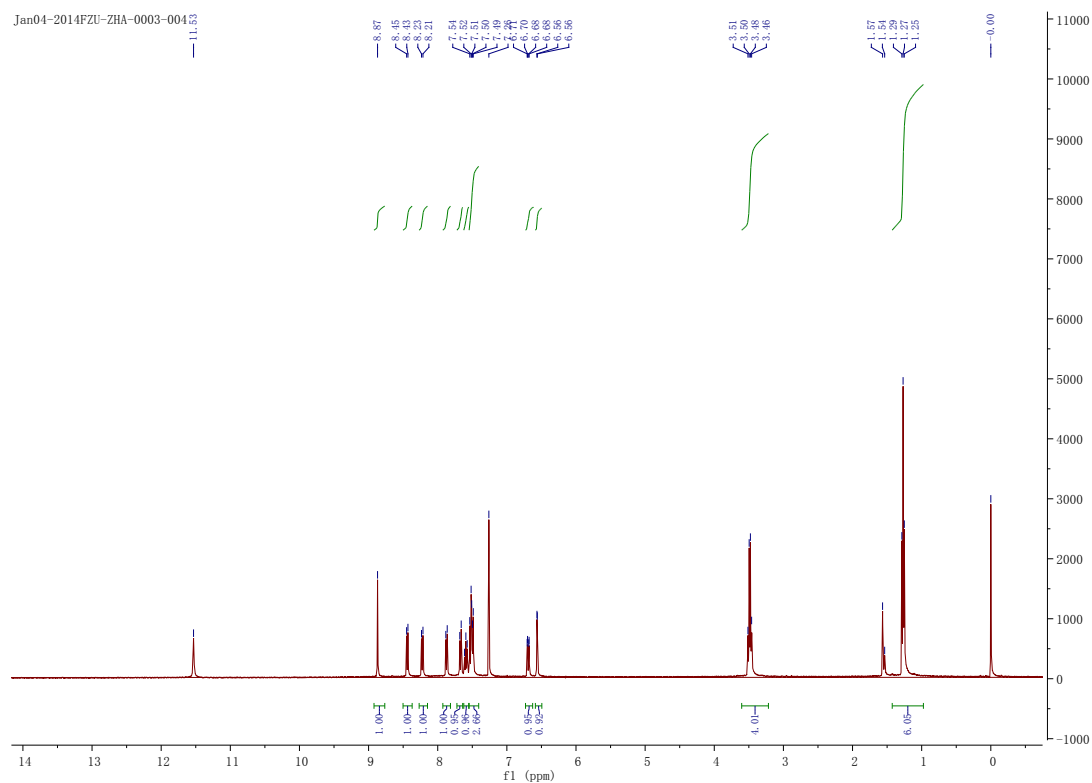

04

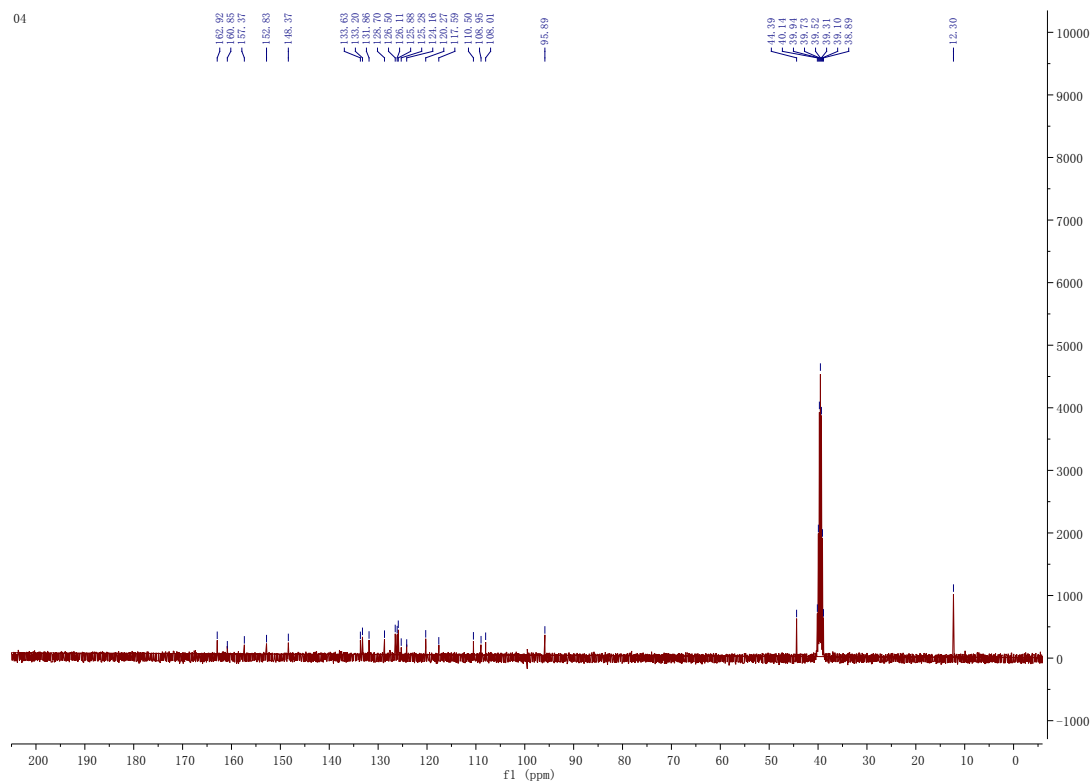

ZHZ-004\_140625143513 #6-16 RT: 0.01-0.04 AV: 11 NL: 1.78E6  
T: FTMS - p ESI Full ms [100.00-600.00]

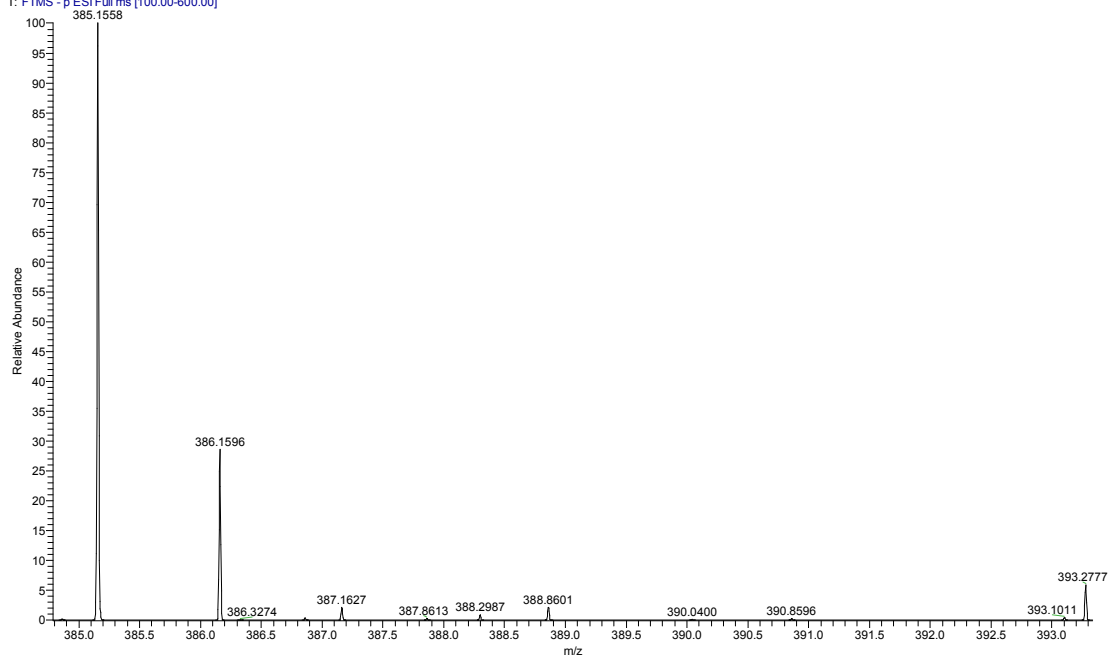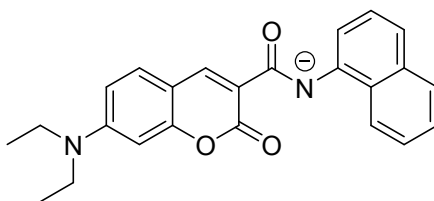

**FZU-06,002**

Chemical Formula:  $C_{24}H_{21}N_2O_3^-$

Exact Mass: 385.1558
